# Supplementary material for: Prevalence and pathogenicity of autoantibodies in patients with idiopathic CD4 lymphopenia
Source: JCI journal article supplement (doi:10.1172/jci136254), 2020-07-07
Supplement: sd2 [file 2]

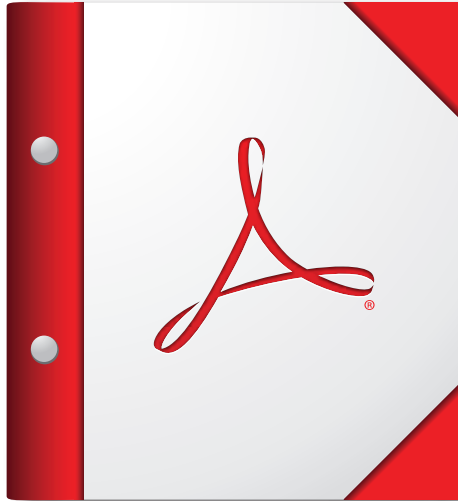

**For the best experience, open this PDF portfolio in  
Acrobat X or Adobe Reader X, or later.**

**Get Adobe Reader Now!**
